# Supplementary material
Source: Research Square preprint supplement (doi:10.21203/rs.3.rs-9004628/v1)
Supplement: Supplementary file 1 [file 8815e19d26571c4b1f6dc7ed.docx]

# Supplementary material

Table Intraclass correlation values by clustering structure

| ***Construct*** | ***Measure*** | ***Intraclass correlation (ICC)*** | | |
| --- | --- | --- | --- | --- |
| **Region** | **School** | **School nested in region** |
| Depression symptom severity | PHQ-9 | 0.015 | 0.026 | 0.026 |
| Anxiety symptom severity | GAD-7 | 0.011 | 0.023 | 0.023 |
| Wellbeing | SWEMWBS | NA | 0.019 | 0.019 |

Table Summary of item-level missingness for social connection indicators, mental health outcomes, and demographic covariates.

| ***Variable*** | ***Missing (n)*** | ***Total (n)*** | ***Missing (%)*** |
| --- | --- | --- | --- |
| **Demographic characteristics** | | | |
| Age | 0 | 1767 | 0.0 |
| Gender | 0 | 1767 | 0.0 |
| Language spoken at home | 4 | 1767 | 0.2 |
| Aboriginal and/or Torres Strait Islander identity | 47 | 1767 | 2.7 |
| Family structure | 5 | 1767 | 0.3 |
| Socio-educational advantage | 0 | 1767 | 0.0 |
| Date of survey | 0 | 1767 | 0.0 |
| **Social connection** | | | |
| Loneliness (UCLA-LS) | 35 | 1767 | 2.0 |
| Peer connection (ISSI) | 39 | 1767 | 2.2 |
| School connection (PSTR-SCM) | 48 | 1767 | 2.7 |
| Community connection (SSC-SC) | 60 | 1767 | 3.4 |
| Discrimination (LSAC) | 119 | 1767 | 6.7 |
| **Experiences meaningful social connection:** | | | |
| Home* | 64 | 1767 | 3.6 |
| School* | 64 | 1767 | 3.6 |
| After school* | 64 | 1767 | 3.6 |
| In town* | 64 | 1767 | 3.6 |
| Social media* | 64 | 1767 | 3.6 |
| Texting* | 64 | 1767 | 3.6 |
| Video games* | 64 | 1767 | 3.6 |
| **Mental health** | | | |
| Depression symptom severity (PHQ-9) | 20 | 1767 | 1.1 |
| Anxiety symptom severity (GAD-7) | 23 | 1767 | 1.3 |
| Wellbeing (SWEMWBS) | 28 | 1767 | 1.6 |
| Suicidal and/or self-harm intention (PHQ-9, Q. 9) | 28 | 1767 | 1.6 |

Table Model fit indices and classification quality for latent class solutions with 2–7 classes.

| ***Number of classes*** | ***AIC*** | ***BIC*** | ***Adjusted BIC*** | ***G2*** | ***Χ2*** | ***Entropy*** | ***Minimum ALCPP*** | ***Maximum ALCPP*** |
| --- | --- | --- | --- | --- | --- | --- | --- | --- |
| 2 | 23936 | 24073 | 23994 | 2913 | 6241 | 0.73 | 0.90 | 0.93 |
| 3 | 23589 | 23796 | 23676 | 2538 | 5017 | 0.67 | 0.81 | 0.87 |
| **4** | **23261** | **23539** | **23377** | **2198** | **4451** | **0.70** | **0.80** | **0.88** |
| 5 | 23189 | 23538 | 23335 | 2099 | 4371 | 0.70 | 0.75 | 0.86 |
| 6 | 23139 | 23559 | 23315 | 2024 | 4289 | 0.71 | 0.72 | 0.83 |
| 7 | 23111 | 23602 | 23316 | 1974 | 4222 | 0.71 | 0.68 | 0.80 |

Figure Elbow plot of AIC, BIC and adjusted BIC values for latent class solutions with 2–7 classes.

Table Class-specific probabilities of endorsing social connection indicators.

| ***Variable*** | ***Class 1*** | ***Class 2*** | ***Class 3*** | ***Class 4*** |
| --- | --- | --- | --- | --- |
| *Class description*  *(n, %)* | *Moderate connection*  *(n = 689, 39.6%)* | *Isolated/online*  *(n = 376, 21.6%)* | *Broadly disconnected*  *(n = 339, 19.5%)* | *Diverse connections*  *(n = 334, 19.2%)* |
| Non-problematic loneliness, UCLA-LS | 0.93 △ | 0.37 ▽ | 0.55 ▽ | 0.97 △ |
| Good social connection, ISSI-SC | 0.86 △ | 0.54 ▽ | 0.37 ▽ | 0.96 △ |
| Positive school connection, SC-PSTR | 0.53 △ | 0.09 ▽ | 0.17 ▽ | 0.56 △ |
| High community connection, SSC-SC | 0.49 △ | 0.23 ▽ | 0.35 ▽ | 0.67 △ |
| Has not experienced of discrimination | 0.74 △ | 0.16 ▽ | 0.44 ▽ | 0.77 △ |
| **Experiences meaningful social connection:** | | | | |
| *In-person settings* | | | | |
| Home | 0.57 △ | 0.42 ▽ | 0.1 ▽ | 0.89 △ |
| School | 0.79 △ | 0.74 △ | 0.2 ▽ | 1.00 △ |
| After-school activities | 0.34 ▽ | 0.22 ▽ | 0 ▽ | 0.85 △ |
| In town | 0.14 ▽ | 0.19 ▽ | 0.01 ▽ | 0.73 △ |
| *Online settings* | | | | |
| Social media | 0.26 ▽ | 0.57 △ | 0.01 ▽ | 0.77 △ |
| Texting | 0.25 ▽ | 0.43 △ | 0 ▽ | 0.84 △ |
| Video games | 0.15 ▽ | 0.27 △ | 0.03 ▽ | 0.54 △ |
| Arrows indicate whether probabilities are greater (△) or smaller (▽) than the sample overall. | | | | |

Table Latent class model fit indices by gender.

|  | ***AIC*** | ***BIC*** | ***Adjusted BIC*** | ***G2*** | ***Χ2*** | ***Entropy*** | ***Minimum ALCPP*** | ***Maximum ALCPP*** |
| --- | --- | --- | --- | --- | --- | --- | --- | --- |
| **Males** | 10089 | 10326 | 10164 | 1368 | 3222 | 0.70 | 0.79 | 0.89 |
| **Females** | 11837 | 12081 | 11919 | 1376 | 3135 | 0.68 | 0.79 | 0.84 |

Table Probabilities for social connectedness indicators across latent classes (males).

| ***Variable*** | ***Class 1 (n=278, 36%)*** | ***Class 2 (n=188, 24%)*** | ***Class 3 (n=185, 24%)*** | ***Class 4 (n=117, 15%)*** |
| --- | --- | --- | --- | --- |
| Non-problematic loneliness, UCLA-LS | 0.97 | 0.69 | 0.97 | 0.52 |
| Good social connection, ISSI-SC | 0.86 | 0.45 | 0.95 | 0.47 |
| Positive school connection, SC-PSTR | 0.63 | 0.21 | 0.54 | 0.20 |
| High community connection, SSC-SC | 0.54 | 0.39 | 0.57 | 0.20 |
| Has not experienced of discrimination | 0.27 | 0.53 | 0.35 | 0.66 |
| **Experiences meaningful social connection:** | | | |  |
| Home | 0.58 | 0.09 | 0.86 | 0.51 |
| School | 0.75 | 0.12 | 1.00 | 0.74 |
| After-school activities | 0.32 | 0.00 | 0.88 | 0.23 |
| In town | 0.18 | 0.00 | 0.76 | 0.14 |
| Social media | 0.21 | 0.02 | 0.80 | 0.52 |
| Texting | 0.25 | 0.00 | 0.84 | 0.34 |
| Video games | 0.25 | 0.03 | 0.81 | 0.41 |

Table Probabilities for social connectedness indicators across latent classes (females)

| ***Variable*** | ***Class 1 (n=358, 40%)*** | ***Class 2 (n=200, 22%)*** | ***Class 3 (n=185, 21%)*** | ***Class 4 (n=150, 17%)*** |
| --- | --- | --- | --- | --- |
| Non-problematic loneliness, UCLA-LS | 0.92 | 0.33 | 0.41 | 0.96 |
| Good social connection, ISSI-SC | 0.89 | 0.29 | 0.66 | 1.00 |
| Positive school connection, SC-PSTR | 0.45 | 0.11 | 0.08 | 0.64 |
| High community connection, SSC-SC | 0.45 | 0.30 | 0.28 | 0.82 |
| Has not experienced of discrimination | 0.25 | 0.66 | 0.91 | 0.25 |
| *Experiences meaningful social connection:* | | | |  |
| Home | 0.57 | 0.20 | 0.45 | 0.91 |
| School | 0.82 | 0.39 | 0.83 | 1.00 |
| After-school activities | 0.37 | 0.06 | 0.26 | 0.84 |
| In town | 0.12 | 0.01 | 0.30 | 0.64 |
| Social media | 0.3 | 0.11 | 0.66 | 0.72 |
| Texting | 0.26 | 0.05 | 0.53 | 0.81 |
| Video games | 0.04 | 0.01 | 0.27 | 0.18 |

Table Demographic characteristics of most likely latent classes

| ***Variable*** | **Class 1** | ***Class 2*** | ***Class 3*** | ***Class 4*** |
| --- | --- | --- | --- | --- |
| *Class description* | *Moderately connected (n=689, 39.6%)* | *Isolated but active online (n=376, 21.6%)* | *Disconnected across all domains (n=339, 19.5%)* | *Very connected across many domains (n=334, 19.2%)* |
| **Age** | 13.94 (0.35) | 13.91 (0.39) | 13.95 (0.50) | 13.93 (0.45) |
| **Gender** |  |  |  |  |
| Male | 44.0% (303) | 30.9% (116) | 48.1% (163) | 55.7% (186) |
| Female | 53.6% (369) | 60.1% (226) | 46.3% (157) | 42.2% (141) |
| Nonbinary | 1.7% (12) | 8.2% (31) | 4.7% (16) | 2.1% (7) |
| Prefer not to say | 0.7% (5) | 0.8% (3) | 0.9% (3) | - |
| **Country of birth** |  |  |  |  |
| Australia | 92.2% (635) | 94.7% (356) | 93.2% (316) | 91.6% (306) |
| Elsewhere | 7.7% (53) | 5.1% (19) | 6.8% (23) | 8.4% (28) |
| **Language spoken at home** |  |  |  |  |
| English | 89.8% (619) | 85.9% (323) | 88.2% (299) | 90.1% (301) |
| Other languages | 10.2% (70) | 13.8% (52) | 11.8% (40) | 9.9% (33) |
| **Aboriginal and/or Torres Strait Islander identity** |  |  |  |  |
| Aboriginal and/or Torres Strait Islander | 2.8% (19) | 5.9% (22) | 8.0% (27) | 3.6% (12) |
| Non-Indigenous | 95.6% (659) | 92.0% (346) | 87.0% (295) | 94.6% (316) |

Table Incidence rate ratios (IRRs) and 98.75% confidence intervals (98.75% CI) for mental health outcomes by latent class membership, accounting for classification uncertainty using the three-step approach. Reference categories are indicated as REF. p < 0.05 indicated by *. IRRs are exponentiated coefficients from negative binomial regression models weighted by latent class probabilities. Models are adjusted for age, gender, language spoken at home, Aboriginal and/or Torres Strait Islander identity, family structure, socio-educational advantage (ICSEA), and date of survey completion.

| ***Variable*** | ***Depression*** | | ***Anxiety*** | | ***Wellbeing*** | | ***Suicidal and/or self-harm ideation*** | |
| --- | --- | --- | --- | --- | --- | --- | --- | --- |
| *IRR (95% CI)* | *p-value* | *IRR (95% CI)* | *p-value* | *IRR (95% CI)* | *p-value* | *IRR (95% CI)* | *p-value* |
| **Class** |  |  |  |  |  |  |  |  |
| 1 | REF | – | REF | – | REF | – | REF | – |
| 2 | 2.02 (1.83–2.22) | <0.001* | 2.16 (1.92–2.42) | <0.001* | 0.76 (0.73–0.78) | <0.001* | 4.22 (3.31–5.38) | <0.001* |
| 3 | 1.72 (1.55–1.91) | <0.001* | 1.76 (1.55–1.99) | <0.001* | 0.78 (0.75–0.81) | <0.001* | 3.33 (2.57–4.32) | <0.001* |
| 4 | 0.92 (0.83–1.02) | 0.121 | 0.93 (0.82–1.06) | 0.258 | 1.05 (1.02–1.09) | 0.002* | 0.77 (0.54–1.10) | 0.155 |
| **Age** | 1.02 (0.98–1.06) | 0.394 | 1.02 (0.97–1.07) | 0.385 | 1.01 (1.00–1.03) | 0.087 | 1.06 (0.97–1.17) | 0.185 |
| **Gender** |  |  |  |  |  |  |  |  |
| Male | REF | – | REF | – | REF | – | REF | – |
| Female | 1.36 (1.26–1.47) | <0.001* | 1.66 (1.52–1.83) | <0.001* | 0.93 (0.91–0.96) | <0.001* | 1.46 (1.19–1.78) | <0.001* |
| Nonbinary | 1.59 (1.30–1.94) | <0.001* | 1.74 (1.38–2.21) | <0.001* | 0.90 (0.83–0.97) | 0.004* | 2.04 (1.35–3.08) | <0.001* |
| **Aboriginal and/or Torres Strait Islander identity** |  |  |  |  |  |  |  |  |
| Non-Indigenous | REF | – | REF | – | REF | – | REF | – |
| Aboriginal and/or Torres Strait Islander | 1.19 (1.00–1.41) | 0.051 | 1.13 (0.92–1.39) | 0.241 | 0.93 (0.87–0.99) | 0.027* | 1.36 (0.94–1.97) | 0.105 |
| **Language spoken at home** |  |  |  |  |  |  |  |  |
| English | REF | – | REF | – | REF | – | REF | – |
| Other languages | 1.06 (0.94–1.21) | 0.329 | 1.12 (0.97–1.31) | 0.127 | 0.98 (0.94–1.03) | 0.491 | 1.28 (0.95–1.71) | 0.104 |
| **Family structure** |  |  |  |  |  |  |  |  |
| Two-parent | REF | – | REF | – | REF | – | REF | – |
| Step or blended | 1.20 (1.04–1.38) | 0.011* | 1.26 (1.07–1.49) | 0.006* | 0.97 (0.92–1.01) | 0.167 | 1.31 (0.95–1.81) | 0.102 |
| Sole parent | 1.19 (1.04–1.36) | 0.011* | 1.26 (1.07–1.48) | 0.004* | 0.93 (0.89–0.98) | 0.005* | 1.35 (0.99–1.84) | 0.057 |
| Other | 1.37 (1.19–1.58) | <0.001* | 1.51 (1.28–1.79) | <0.001* | 0.92 (0.87–0.96) | <0.001* | 1.35 (0.98–1.86) | 0.068 |
| **ICSEA** | 1.03 (0.98–1.07) | 0.206 | 1.04 (0.99–1.10) | 0.109 | 1.01 (1.00–1.03) | 0.122 | 1.10 (0.99–1.23) | 0.065 |
| **Survey completion date** | 1.06 (1.02–1.11) | 0.003* | 1.06 (1.01–1.12) | 0.011* | 0.99 (0.98–1.00) | 0.163 | 1.18 (1.07–1.30) | <0.001* |

Table Incidence rate ratios (IRRs) and 95% confidence intervals for mental health outcomes by most-likely latent class membership and covariates. Reference categories are indicated as REF. p < 0.05 indicated by *. IRRs are exponentiated coefficients from negative binomial regression models weighted by latent class probabilities. Models are adjusted for age, gender, language spoken at home, Aboriginal and/or Torres Strait Islander identity, family structure, socio-educational advantage (ICSEA), and date of survey completion.

| ***Variable*** | ***Depression*** | | ***Anxiety*** | | ***Wellbeing*** | | ***Suicidal and/or self-harm ideation*** | |
| --- | --- | --- | --- | --- | --- | --- | --- | --- |
| *IRR (95% CI)* | *p-value* | *IRR (95% CI)* | *p-value* | *IRR (95% CI)* | *p-value* | *IRR (95% CI)* | *p-value* |
| **Class** |  |  |  |  |  |  |  |  |
| 1 | REF | – | REF | – | REF | – | REF | – |
| 2 | 2.23 (2.03–2.46) | <0.001* | 2.40 (2.14–2.70) | <0.001* | 0.73 (0.71–0.76) | <0.001* | 5.27 (4.13–6.71) | <0.001* |
| 3 | 1.88 (1.70–2.08) | <0.001* | 1.89 (1.67–2.13) | <0.001* | 0.76 (0.73–0.79) | <0.001* | 3.92 (3.03–5.07) | <0.001* |
| 4 | 0.97 (0.87–1.08) | 0.594 | 0.97 (0.85–1.10) | 0.601 | 1.04 (1.01–1.08) | 0.014* | 0.82 (0.57–1.19) | 0.302 |
| **Age** | 1.02 (0.99–1.06) | 0.223 | 1.03 (0.98–1.07) | 0.25 | 1.01 (1.00–1.02) | 0.086 | 1.07 (0.98–1.17) | 0.126 |
| **Gender** |  |  |  |  |  |  |  |  |
| Male | REF | – | REF | – | REF | – | REF | – |
| Female | 1.35 (1.25–1.46) | <0.001* | 1.66 (1.52–1.82) | <0.001* | 0.93 (0.91–0.96) | <0.001* | 1.46 (1.19–1.78) | <0.001* |
| Nonbinary | 1.55 (1.28–1.88) | <0.001* | 1.70 (1.35–2.15) | <0.001* | 0.91 (0.85–0.98) | 0.012* | 1.95 (1.31–2.90) | 0.001* |
| **Aboriginal and/or Torres Strait Islander identity** |  |  |  |  |  |  |  |  |
| Non-Indigenous | REF | – | REF | – | REF | – | REF | – |
| Aboriginal and/or Torres Strait Islander | 0.86 (0.73–1.02) | 0.074 | 0.89 (0.73–1.09) | 0.272 | 1.07 (1.00–1.14) | 0.036* | 0.76 (0.53–1.09) | 0.13 |
| **Language spoken at home** |  |  |  |  |  |  |  |  |
| English | REF | – | REF | – | REF | – | REF | – |
| Other languages | 1.06 (0.94–1.20) | 0.367 | 1.10 (0.95–1.28) | 0.185 | 0.99 (0.95–1.03) | 0.58 | 1.24 (0.93–1.65) | 0.144 |
| **Family structure** |  |  |  |  |  |  |  |  |
| Two-parent | REF | – | REF | – | REF | – | REF | – |
| Step or blended | 0.88 (0.74–1.06) | 0.189 | 0.86 (0.69–1.06) | 0.163 | 1.04 (0.97–1.11) | 0.249 | 0.96 (0.64–1.44) | 0.831 |
| Sole parent | 0.89 (0.74–1.06) | 0.197 | 0.86 (0.69–1.06) | 0.163 | 1.00 (0.94–1.07) | 0.954 | 1.02 (0.69–1.53) | 0.905 |
| Other | 0.74 (0.64–0.84) | <0.001* | 0.67 (0.56–0.79) | <0.001* | 1.08 (1.02–1.13) | 0.004* | 0.74 (0.54–1.02) | 0.062 |
| **ICSEA** | 1.04 (1.00–1.09) | 0.062 | 1.06 (1.00–1.11) | 0.035* | 1.01 (0.99–1.02) | 0.354 | 1.13 (1.02–1.26) | 0.019* |
| **Survey completion date** | 1.05 (1.01–1.10) | 0.010* | 1.05 (1.00–1.10) | 0.032* | 0.99 (0.98–1.00) | 0.161 | 1.17 (1.06–1.29) | 0.001* |

Table Incidence rate ratios (IRRs) and 95% confidence intervals (95% CI) for mental health outcomes by latent class × gender interactions. IRRs are exponentiated coefficients from negative binomial regression models weighted by latent class probabilities. Models are adjusted for age, language spoken at home, Aboriginal and/or Torres Strait Islander identity, family structure, socio-educational advantage (ICSEA), and date of survey completion. Reference categories: Class 1 and Male. p-values are reported for each IRR.

| ***Interaction Term*** | ***Depression*** | | ***Anxiety*** | | ***Wellbeing*** | | ***Suicidal and/or self-harm ideation*** | |
| --- | --- | --- | --- | --- | --- | --- | --- | --- |
| *IRR (95% CI)* | *p-value* | *IRR (95% CI)* | *p-value* | *IRR (95% CI)* | *p-value* | *IRR (95% CI)* | *p-value* |
| Class 2 × Girl | 1.00 [0.81, 1.23] | 0.975 | 0.79 [0.62, 1.01] | 0.062 | 0.92 [0.86, 0.99] | 0.028 | 1.16 [0.69, 1.97] | 0.573 |
| Class 3 × Girl | 0.92 [0.75, 1.14] | 0.464 | 0.84 [0.65, 1.08] | 0.178 | 0.95 [0.88, 1.02] | 0.190 | 1.15 [0.67, 1.97] | 0.604 |
| Class 4 × Girl | 0.87 [0.70, 1.07] | 0.190 | 0.80 [0.62, 1.03] | 0.090 | 1.04 [0.97, 1.11] | 0.246 | 0.79 [0.39, 1.61] | 0.518 |
| Class 2 × Nonbinary | 0.82 [0.49, 1.39] | 0.459 | 0.67 [0.36, 1.24] | 0.201 | 0.95 [0.79, 1.15] | 0.615 | 0.78 [0.23, 2.63] | 0.689 |
| Class 3 × Nonbinary | 0.80 [0.44, 1.48] | 0.478 | 0.60 [0.29, 1.25] | 0.173 | 1.06 [0.85, 1.33] | 0.592 | 0.88 [0.23, 3.35] | 0.849 |
| Class 4 × Nonbinary | 0.48 [0.21, 1.07] | 0.074 | 0.30 [0.11, 0.82] | 0.019 | 1.30 [1.00, 1.69] | 0.046 | 0.01 [0.00, 5932.44] | 0.498 |
